# Supplementary material for: Neurodevelopmental disorders among term infants exposed to antenatal corticosteroids during pregnancy: a population-based study
Source: PubMed Central journal article supplement — BMJ Open. 2019 Sep 30;9(9):e031197. doi: 10.1136/bmjopen-2019-031197 (PMC6773295; doi:10.1136/bmjopen-2019-031197), 2019-09-30
Supplement: bmjopen-2019-031197supp001.pdf [file bmjopen-2019-031197supp001.pdf]

1 **SUPPLEMENTAL TABLES**2 **Table S1: List of diagnostic and billing codes used to define the outcome variables**

| <b>Outcome</b>            | <b>Code</b> | <b>Description</b>                                                                                                                                                           | <b>Type of code</b> |
|---------------------------|-------------|------------------------------------------------------------------------------------------------------------------------------------------------------------------------------|---------------------|
| <b>Audiometry Testing</b> | G141        | Cortical evoked audiometry - professional component                                                                                                                          | Feecode             |
|                           | G143        | Cortical evoked audiometry - technical component                                                                                                                             | Feecode             |
|                           | G144        | Brain stem evoked audiometry - professional component                                                                                                                        | Feecode             |
|                           | G146        | Brain stem evoked audiometry - technical component                                                                                                                           | Feecode             |
|                           | G440        | Pure tone threshold audiometry with or without bone conduction - technical component                                                                                         | Feecode             |
|                           | G441        | Pure tone threshold audiometry (with or without bone conduction) and speech reception threshold and/or speech discrimination scores - technical component                    | Feecode             |
|                           | G442        | Impedance audiometry by manual or automated methods - technical component                                                                                                    | Feecode             |
|                           | G443        | Miscellaneous advanced testing e.g. recruitment, tests of malingering, central auditory and stapedial reflex decay tests - per test - technical component, to a maximum of 1 | Feecode             |
|                           | G448        | Impedance audiometry by manual or automated methods - Sound field audiometry (infants and children) - technical component                                                    | Feecode             |
|                           | G450        | Impedance audiometry by manual or automated methods - Sound field audiometry (infants and children) - professional component                                                 | Feecode             |
|                           | G525        | Pure tone threshold audiometry with or without bone conduction - professional component                                                                                      | Feecode             |

|                                          |      |                                                                                                                                                                                   |                     |
|------------------------------------------|------|-----------------------------------------------------------------------------------------------------------------------------------------------------------------------------------|---------------------|
|                                          | G526 | Pure tone threshold audiometry (with or without bone conduction) and speech reception threshold and/or speech discrimination scores - professional component                      | Feecode             |
|                                          | G529 | Impedance audiometry by manual or automated methods - professional component                                                                                                      | Feecode             |
|                                          | G530 | Miscellaneous advanced testing e.g. recruitment, testing of malingering, central auditory and stapedial reflex decay tests - per test - professional component, to a maximum of 1 | Feecode             |
| <b>Visual testing</b>                    |      | Specialty in (Ophthalmology, Optometrists)                                                                                                                                        | Physician specialty |
| <b>Suspected neurocognitive disorder</b> | 298  | Other psychoses                                                                                                                                                                   | Diagnosis           |
|                                          | 299  | Childhood psychoses (e.g., autism)                                                                                                                                                | Diagnosis           |
|                                          | 300  | Anxiety neurosis, hysteria, neurasthenia, obsessive compulsive neurosis, reactive depression                                                                                      | Diagnosis           |
|                                          | 307  | Habit spasms, tics, stuttering, tension headaches, anorexia nervosa, sleep disorders, enuresis                                                                                    | Diagnosis           |
|                                          | 311  | Depressive or other non-psychotic disorders, not elsewhere classified                                                                                                             | Diagnosis           |
|                                          | 313  | Behavior disorders of childhood and adolescence                                                                                                                                   | Diagnosis           |
|                                          | 314  | Hyperkinetic syndrome of childhood                                                                                                                                                | Diagnosis           |
|                                          | 315  | Specified delays in development (e.g. dyslexia, dyslalia, motor retardation)                                                                                                      | Diagnosis           |
|                                          | 319  | Mental retardation                                                                                                                                                                | Diagnosis           |
|                                          | 343  | Cerebral palsy                                                                                                                                                                    | Diagnosis           |

|  |     |          |           |
|--|-----|----------|-----------|
|  | 345 | Epilepsy | Diagnosis |
|--|-----|----------|-----------|
